# Supplementary material for: Measurement report: Plume heights of the April 2021 La Soufrière eruptions from GOES-17 side views and GOES-16–MODIS stereo views
Source: Copernicus journal article supplement (doi:10.5194/acp-22-12311-2022), 2022-09-21
Supplement: Supplementary file 1 [file acp-22-12311-2022-supplement.zip]

**Table S1.** Date, time, GOES-16 dark pixel  $BT_{11}$  and the corresponding minimum–maximum umbrella height ( $H_U$ ), GOES-17 side view umbrella height, and GOES-17 side view overshooting top height ( $H_{OT}$ ) for the 30 daytime cases of the April 2021 La Soufrière eruptions plotted in Fig. 13 and Fig. 14. Time refers to the start of the full disk scan. For the GOES-17 side view  $H_U$ , a  $\pm 500$  m uncertainty range is given (Horváth et al., 2021a).

| Date, Time       | GOES-16<br>$BT_{11, \min}$ (K) | GOES-16<br>min–max $H_U$ (km) | GOES-17<br>$H_U$ (km) | GOES-17<br>$H_{OT}$ (km) |
|------------------|--------------------------------|-------------------------------|-----------------------|--------------------------|
| 09 April, 12:50Z | 213.99                         | 13.1–22.3                     | 15.5–16.0             |                          |
| 09 April, 19:10Z | 197.39                         | 15.7–18.7                     | 16.5–17.0             |                          |
| 10 April, 09:45Z | 191.82                         | 16.4–17.2                     |                       | 22.0                     |
| 10 April, 10:00Z | 197.63                         | 15.3–19.1                     | 18.0–18.5             | 21.0                     |
| 10 April, 11:00Z | 194.83                         | 15.9–18.8                     | 18.5–19.0             | 23.0                     |
| 10 April, 12:20Z | 197.63                         | 15.4–19.2                     | 19.5–20.0             | 21.0                     |
| 10 April, 13:00Z | 194.95                         | 16.2–18.8                     |                       | 20.5                     |
| 10 April, 13:10Z | 196.31                         | 15.8–18.9                     | 18.0–18.5             | 21.5                     |
| 10 April, 13:20Z | 195.82                         | 15.9–18.9                     | 18.5–19.0             |                          |
| 10 April, 14:50Z | 197.27                         | 15.8–18.7                     | 18.0–18.5             | 21.0                     |
| 10 April, 16:20Z | 245.04                         | 9.3                           | 10.5–11.0             |                          |
| 10 April, 16:30Z | 197.27                         | 15.8–18.3                     | 18.0–18.5             | 23.0                     |
| 10 April, 18:50Z | 207.27                         | 13.8–20.5                     | 16.5–17.0             |                          |
| 10 April, 19:00Z | 203.79                         | 14.5–19.8                     | 16.5–17.0             | 18.0                     |
| 10 April, 19:10Z | 201.25                         | 15.3–19.3                     | 16.5–17.0             |                          |
| 11 April, 10:30Z | 275.70                         | 4.4                           | 6.0–6.5               |                          |
| 11 April, 10:45Z | 200.71                         | 14.7–19.4                     | 17.5–18.0             | 19.0                     |

**Table S1.** Continued.

| Date, Time       | GOES-16<br>BT <sub>11, min</sub> (K) | GOES-16<br>min–max H <sub>U</sub> (km) | GOES-17<br>H <sub>U</sub> (km) | GOES-17<br>H <sub>OT</sub> (km) |
|------------------|--------------------------------------|----------------------------------------|--------------------------------|---------------------------------|
| 11 April, 11:00Z | 199.02                               | 15.0–19.1                              | 18.0–18.5                      |                                 |
| 11 April, 11:30Z | 252.21                               | 8.3                                    | 9.0–9.5                        |                                 |
| 11 April, 11:45Z | 231.42                               | 10.9                                   | 12.5–13.0                      |                                 |
| 11 April, 13:30Z | 216.21                               | 12.8–23.5                              | 16.0–16.5                      |                                 |
| 11 April, 13:40Z | 199.59                               | 15.0–19.1                              | 18.5–19.0                      | 21.0                            |
| 11 April, 13:50Z | 200.49                               | 14.8–19.2                              | 18.5–19.0                      |                                 |
| 11 April, 20:10Z | 226.16                               | 11.6                                   | 14.0–14.5                      |                                 |
| 11 April, 20:30Z | 200.49                               | 14.9–19.4                              | 16.5–17.0                      |                                 |
| 11 April, 20:40Z | 200.82                               | 14.9–19.5                              | 16.5–17.0                      |                                 |
| 13 April, 10:45Z | 203.38                               | 14.2–19.8                              | 17.0–17.5                      | 20.0                            |
| 13 April, 12:00Z | 263.2                                | 6.4                                    | 7.5–8.0                        |                                 |
| 18 April, 21:00Z | 267.86                               | 5.6                                    | 6.0–6.5                        |                                 |
| 22 April, 15:20Z | 244.11                               | 9.0                                    | 10.5–11.0                      |                                 |
