# Supplementary material for: Measurement report: Plume heights of the April 2021 La Soufrière eruptions from GOES-17 side views and GOES-16–MODIS stereo views
Source: Copernicus journal article supplement (doi:10.5194/acp-22-12311-2022), 2022-09-21
Supplement: Supplementary file 2 [file acp-22-12311-2022-supplement.zip]

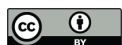

## *Supplement of*

# **Measurement report: Plume heights of the April 2021 La Soufrière eruptions from GOES-17 side views and GOES-16–MODIS stereo views**

**Ákos Horváth et al.**

*Correspondence to:* Ákos Horváth (akos.horvath@uni-hamburg.de, hfakos@gmail.com)

- acp-22-12311-2022-supplement-title-page.pdf
- Apr10\_Aqua\_StVincent\_MODIS\_B01.nc
- Apr10\_Terra\_StVincent\_MODIS\_B01.nc
- LaSoufriere2021\_supplement.pdf
- supplement\_animation1\_rev.mp4
- supplement\_animation2\_rev.mp4
- supplement\_animation3\_rev.mp4
- supplement\_animation4\_rev.mp4
- supplement\_animation5\_rev.mp4
- supplement\_animation6\_rev.mp4

The copyright of individual parts of the supplement might differ from the article licence.
